# Supplementary material for: Efficacy of Second Generation Direct-Acting Antiviral Agents for Treatment Naïve Hepatitis C Genotype 1: A Systematic Review and Network Meta-Analysis
Source: PubMed Central journal article supplement (PMC4701000; doi:10.1371/journal.pone.0145953), 2015-12-31

**S2 Figure. Forest plot of pooled risk ratio of sustained virological response at week 12 for comparison between sofosbuvir plus ledipasvir with ribavirin and sofosbuvir plus ledipasvir**

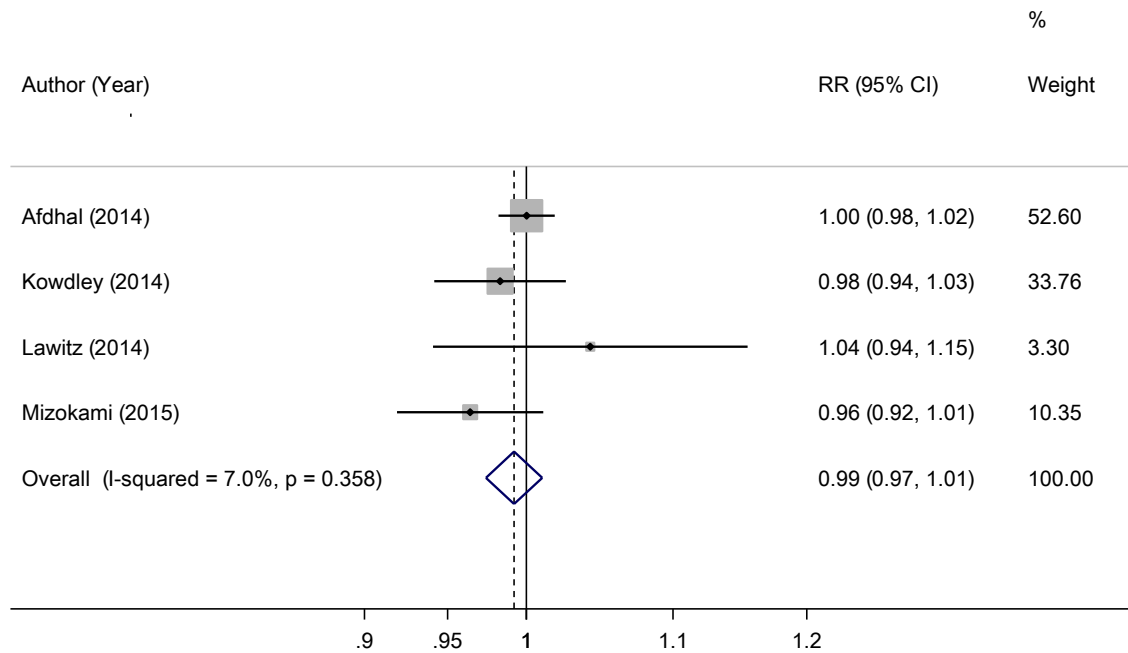

Supplement: pone.0145953.s005.pdf [file pone.0145953.s005.pdf]
