# Supplementary material for: Efficacy of Second Generation Direct-Acting Antiviral Agents for Treatment Naïve Hepatitis C Genotype 1: A Systematic Review and Network Meta-Analysis
Source: PubMed Central journal article supplement (PMC4701000; doi:10.1371/journal.pone.0145953), 2015-12-31

**S4 Figure. Funnel plot of risk ratios of sustained virological response at week 12 after the end of treatment between sofosbuvir-ledipasvir with ribavirin and sofosbuvir-ledipasvir**

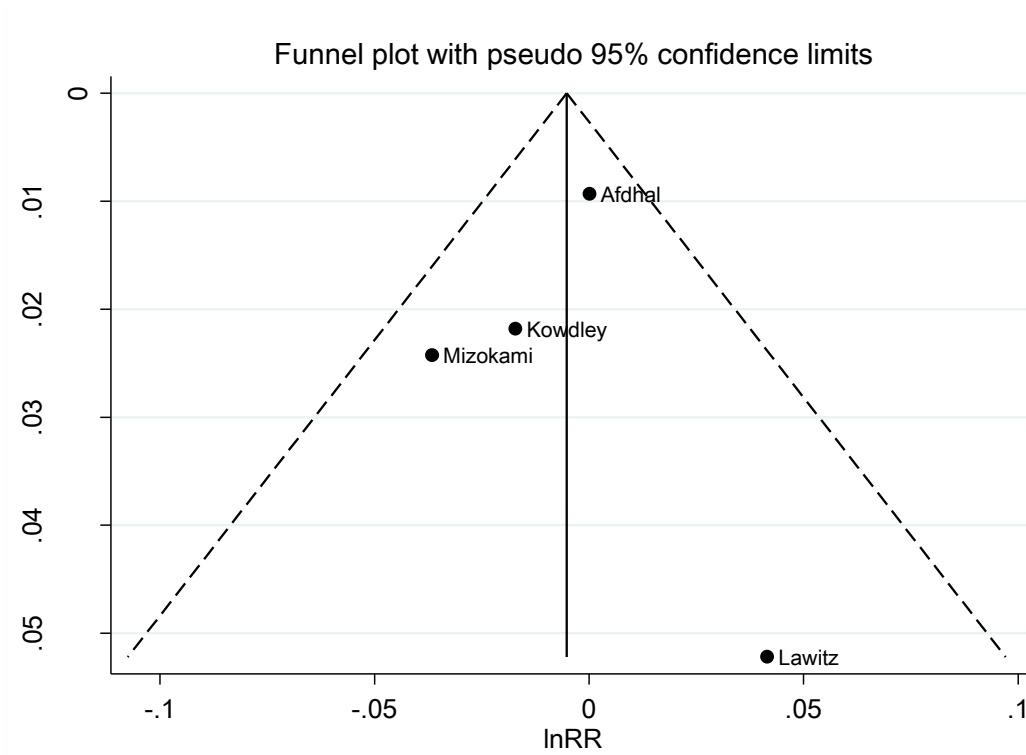

Supplement: pone.0145953.s007.pdf [file pone.0145953.s007.pdf]
