# Supplementary material for: Efficacy of Second Generation Direct-Acting Antiviral Agents for Treatment Naïve Hepatitis C Genotype 1: A Systematic Review and Network Meta-Analysis
Source: PubMed Central journal article supplement (PMC4701000; doi:10.1371/journal.pone.0145953), 2015-12-31
Supplement: pone.0145953.s011.pdf [file pone.0145953.s011.pdf]

**S3 Table. Pooled incidence rate of sustained virological response at weeks 12 and 24 after the end of treatment**

| <b>Treatment</b>      | <b>Pooled SVR12 (95% CI)</b> | <b>Pooled SVR24 (95% CI)</b> |
|-----------------------|------------------------------|------------------------------|
| PR                    | 51% (43%, 59%)               | 48% (40%, 57%)               |
| SMV plus PR           | 83% (79%, 86%)               | 83% (80%, 86%)               |
| DCV plus PR           | 65% (57%, 73%)               | 62% (53%, 70%)               |
| SOF plus PR           | 82% (63%, 100%)              | 81% (68%, 95%)               |
| SOF plus LDV          | 98% (95%, 100%)              | -                            |
| SOF plus SMV          | 97% (90%, 100%)              | -                            |
| SOF plus DCV          | 100% (95%, 100%)             | 96% (88%, 99%)               |
| PrOD                  | -                            | 89% (79%, 95%)               |
| SOF plus LDV with RBV | 97% (95%, 100%)              | -                            |
| SOF plus SMV with RBV | 93% (86%, 100%)              | -                            |
| SOF plus DCV with RBV | 96% (92%, 100%)              | 95% (85%, 99%)               |
| PrOD with RBV         | -                            | 95% (83%, 99%)               |

CI, confidence interval; DCV, daclatasvir; LDV, ledipasvir; PR, pegylated interferon-ribavirin; RBV, ribavirin; SMV, simeprevir; SOF, sofosbuvir; SVR12, sustained virological response at week 12 after the end of treatment; SVR24, sustained virological response at week 24 after the end of treatment
