# Supplementary material for: Efficacy of Second Generation Direct-Acting Antiviral Agents for Treatment Naïve Hepatitis C Genotype 1: A Systematic Review and Network Meta-Analysis
Source: PubMed Central journal article supplement (PMC4701000; doi:10.1371/journal.pone.0145953), 2015-12-31
Supplement: pone.0145953.s012.pdf [file pone.0145953.s012.pdf]

**S4 Table. Pooled incidence rate of serious adverse event at entire of treatment**

| <b>Treatment regimens</b> | <b>No. of studies</b> | <b>No. of subjects</b> | <b>No. of having events</b> | <b>Rate (%) of events (95% CI)</b> |
|---------------------------|-----------------------|------------------------|-----------------------------|------------------------------------|
| PR                        | 9                     | 544                    | 42                          | 7.5 (5.2, 9.7)                     |
| SMV plus PR               | 5                     | 1,032                  | 55                          | 5.0 (3.6, 6.3)                     |
| DCV plus PR               | 2                     | 353                    | 28                          | 7.9 (5.1, 10.7)                    |
| SOF plus PR               | 2                     | 144                    | 6                           | 4.10 (0.0, 9.6)                    |
| SOF plus LDV              | 3                     | 903                    | 29                          | 3.0 (1.3, 4.7)                     |
| SOF plus DCV              | 1                     | 100                    | 7                           | 7.0 (2.0, 12.0)                    |
| PrOD                      | 1                     | 79                     | 2                           | 2.5 (0.3, 8.8)                     |
| SOF plus LDV with RBV     | 3                     | 669                    | 16                          | 1.9 (0, 4.5)                       |
| SOF plus DCV with RBV     | 1                     | 70                     | 2                           | 2.9 (1.0, 6.8)                     |
| PrOD with RBV             | 1                     | 36                     | 1                           | 2.8 (0.1, 14.5)                    |

CI, confidence interval; DCV, daclatasvir; LDV, ledipasvir; PR, pegylated interferon-ribavirin; RBV, ribavirin; SMV, simeprevir; SOF, sofosbuvir
