# Supplementary material for: Efficacy of Second Generation Direct-Acting Antiviral Agents for Treatment Naïve Hepatitis C Genotype 1: A Systematic Review and Network Meta-Analysis
Source: PubMed Central journal article supplement (PMC4701000; doi:10.1371/journal.pone.0145953), 2015-12-31
Supplement: pone.0145953.s013.pdf [file pone.0145953.s013.pdf]

**S5 Table. Pooled incidence rate of anemia at entire of treatment**

| <b>Treatment comparison</b> | <b>No. of studies</b> | <b>No. of subjects</b> | <b>No. of having events</b> | <b>Pooled incidence rate (%) (95% CI)</b> |
|-----------------------------|-----------------------|------------------------|-----------------------------|-------------------------------------------|
| PR                          | 9                     | 544                    | 107                         | 25.4 (14.8, 36.0)                         |
| SMV plus PR                 | 5                     | 1,032                  | 263                         | 29.1 (18.6, 39.6)                         |
| DCV plus PR                 | 2                     | 353                    | 33                          | 21.5 (0.0, 53.6)                          |
| SOF plus PR                 | 2                     | 144                    | 26                          | 17.7 (11.5, 23.9)                         |
| SOF plus LDV                | 3                     | 901                    | 4                           | 0.9 (0.0, 1.8)                            |
| PrOD                        | 1                     | 79                     | 1                           | 1.3 (0.0, 6.9)                            |
| SOF plus LDV with RBV       | 3                     | 671                    | 66                          | 9.6 (7.4, 11.9)                           |
| PrOD with RBV               | 1                     | 40                     | 4                           | 10.0 (2.8, 23.7)                          |

CI, confidence interval; DCV, daclatasvir; LDV, ledipasvir; PR, pegylated interferon-ribavirin; RBV, ribavirin; SMV, simeprevir; SOF, sofosbuvir
